# Supplementary material for: Health-related quality of life and lived experiences in males and females with thoracic aortic disease and their partners
Source: PubMed Central journal article supplement — Open Heart. 2020 Oct 8;7(2):e001419. doi: 10.1136/openhrt-2020-001419 (PMC7545641; doi:10.1136/openhrt-2020-001419), 2020-10-08
Supplement: openhrt-2020-001419supp002.pdf [file openhrt-2020-001419supp002.pdf]

**SUPPLEMENTAL FILE 2.** Patient characteristics of TAD-patients and screening-participants

|                                                         | <b>Total<br/>(n=261)</b> | <b>TAD patients<br/>(n= 147)</b> | <b>Screening-participants<br/>(n= 114)</b> | <b>p-value</b> |
|---------------------------------------------------------|--------------------------|----------------------------------|--------------------------------------------|----------------|
| Age - y                                                 | 52.9±15.8                | 59.2±12.6                        | 44.9±15.9                                  | <0.001**       |
| Sex - % female                                          | 125 (47.9)               | 54 (36.7)                        | 71 (62.3)                                  | <0.001**       |
| Length - cm                                             | 177.2±14.7               | 178.4±14.2                       | 175.6±15.3                                 | 0.137          |
| Weight - kg                                             | 83.9±19.4                | 87.9±19.1                        | 78.7±18.6                                  | <0.001**       |
| BSA - m <sup>2</sup>                                    | 2.0±0.2                  | 2.0±0.2                          | 1.9±0.2                                    | <0.001**       |
| Hypertension                                            | 117 (44.8)               | 84 (57.1)                        | 33 (28.9)                                  | <0.001**       |
| Hyperlipidemia                                          | 66 (25.3)                | 51 (34.7)                        | 15 (13.2)                                  | <0.001**       |
| Smoking                                                 | 25 (9.6)                 | 13 (8.8)                         | 12 (10.5)                                  | 0.647          |
| Diabetes                                                | 9 (3.4)                  | 7 (4.8)                          | 2 (1.8)                                    | 0.187          |
| Renal dysfunction                                       | 5 (1.9)                  | 4 (2.7)                          | 1 (0.9)                                    | 0.281          |
| History of depression                                   | 16 (6.1)                 | 8 (5.4)                          | 8 (7.0)                                    | 0.599          |
| History of anxiety disorder                             | 4 (1.5)                  | 2 (1.4)                          | 2 (1.8)                                    | 0.797          |
| Beta blocker use                                        | 60 (23.0)                | 50 (34.0)                        | 10 (8.8)                                   | <0.001**       |
| ARB use                                                 | 34 (13.0)                | 30 (20.4)                        | 4 (3.5)                                    | <0.001**       |
| ACEi use                                                | 42 (16.1)                | 32 (21.8)                        | 10 (8.8)                                   | 0.005**        |
| Diagnosis                                               |                          |                                  |                                            | <0.001**       |
| Marfan Syndrome                                         | 10 (3.8)                 | 6 (4.1)                          | 4 (3.5)                                    |                |
| Loeys-Dietz Syndrome                                    | 10 (3.8)                 | 4 (2.7)                          | 6 (5.3)                                    |                |
| Ehlers-Danlos Syndrome                                  | 2 (0.8)                  | 0 (0.0)                          | 2 (1.8)                                    |                |
| Other                                                   | 12 (4.6)                 | 2 (1.4)                          | 10 (8.8)                                   |                |
| Confirmed genetic mutation                              | 61 (23.4)                | 31 (21.1)                        | 30 (26.3)                                  | 0.001          |
| Positive family history aortic disease                  | 132 (50.6)               | 60 (40.8)                        | 72 (63.2)                                  | 0.001          |
| Abdominal aortic aneurysm                               | 9 (3.4)                  | 8 (5.9)                          | 1 (0.8)                                    | 0.025*         |
| Maximal diameter aortic root <sup>1</sup>               | 37.6±5.7                 | 40.4±5.5                         | 34.3±4.0                                   | <0.001**       |
| Indexed diameter aortic root <sup>1</sup> - mm/BSA      | 19.0±2.9                 | 19.7±3.0                         | 18.0±2.5                                   | <0.001**       |
| Maximal diameter ascending aorta <sup>1</sup>           | 37.0±6.8                 | 40.8±5.5                         | 32.2±5.1                                   | <0.001**       |
| Indexed diameter ascending aorta <sup>1</sup> - mm/BSA  | 18.7±3.9                 | 20.1±3.7                         | 16.8±3.2                                   | <0.001**       |
| Maximal diameter descending aorta <sup>1</sup>          | 27.1±6.3                 | 30.0±5.9                         | 23.9±5.2                                   | <0.001**       |
| Indexed diameter descending aorta <sup>1</sup> - mm/BSA | 13.7±3.3                 | 14.7±3.3                         | 12.5±2.9                                   | <0.001**       |
| Previous aortic surgery                                 | 33 (12.6)                | 32 (21.8)                        | 1 (0.9)                                    | <0.001**       |
| Previous dissection                                     | 23 (8.8)                 | 20 (13.6)                        | 3 (2.6)                                    | 0.002**        |
| Current partner                                         | 126 (75.9)               | 50 (66.7)                        | 76 (83.5)                                  | 0.012          |
| Current employment <sup>2</sup>                         | 103 (39.5)               | 61 (51.7)                        | 42 (48.8)                                  | 0.687          |
| Paid job                                                | 96 (36.8)                | 57 (48.3)                        | 39 (45.3)                                  |                |
| Volunteer work                                          | 7 (2.7)                  | 4 (3.4)                          | 3 (3.5)                                    |                |
| Retired                                                 | 57 (21.8)                | 43 (36.4)                        | 14 (16.3)                                  |                |
| Student                                                 | 16 (6.1)                 | 1 (0.8)                          | 15 (17.4)                                  |                |
| Unable to work / disabled                               | 16 (6.1)                 | 10 (8.5)                         | 6 (7.0)                                    |                |
| Unemployed                                              | 12 (4.6)                 | 3 (2.5)                          | 9 (10.5)                                   |                |
| Exercise                                                |                          |                                  |                                            |                |
| Sports participation <sup>3</sup>                       | 105 (40.2)               | 50 (34.0)                        | 55 (48.2)                                  | 0.023*         |
| Walking or cycling                                      | 104 (39.8)               | 63 (42.9)                        | 41 (36.0)                                  |                |
| None                                                    | 36 (13.8)                | 24 (16.3)                        | 12 (10.5)                                  |                |

Data are expressed as mean ± SD or as absolute and percentage. BSA=Body Surface Area; ARB= Angiotensin II receptor blocker; ACEi= Angiotensin Converting Enzyme inhibitor; LVEF= left ventricular ejection fraction; MFS= Marfan Syndrome; LDS 3= Loeys-

---

Dietz Syndrome type 3 (SMAD3 mutation).

<sup>1</sup> Only patients without previous aortic surgery.

<sup>2</sup> Current employment= Paid job or volunteer work.

<sup>3</sup> Defined as: Participating in any sport other than daily walking or cycling at any level at least once a week.

\* Significant at the 0.05 level

\*\* Significant at the 0.01 level
