# Supplementary material for: Health-related quality of life and lived experiences in males and females with thoracic aortic disease and their partners
Source: PubMed Central journal article supplement — Open Heart. 2020 Oct 8;7(2):e001419. doi: 10.1136/openhrt-2020-001419 (PMC7545641; doi:10.1136/openhrt-2020-001419), 2020-10-08
Supplement: openhrt-2020-001419supp003.pdf [file openhrt-2020-001419supp003.pdf]

**SUPPLEMENTAL FILE 3.** Stratified analysis for male-female differences in TAD-patients and screening-participants.

**TABLE 2a.** Male-female scores of screening-participants on all questionnaires.

|                      | Total (n=114)      | Males (n=43)        | Females (n=71)     | p-value |
|----------------------|--------------------|---------------------|--------------------|---------|
| <b>RDSQ</b>          |                    |                     |                    |         |
| Total score          | 44.0 (29.5-68.3)   | 40.0 (28.0-65.0)    | 47.0 (32.0-70.0)   | 0.185   |
| <b>SF-36</b>         |                    |                     |                    |         |
| Physical Functioning | 90.0 (75.0-100.0)  | 100.0 (85.0-100.0)  | 90.0 (60.0-95.0)   | 0.001*  |
| Role Physical        | 100.0 (50.0-100.0) | 100.0 (75.0-100.0)  | 100.0 (25.0-100.0) | 0.257   |
| Bodily Pain          | 90.0 (57.5-100.0)  | 100.0 (77.5-100.0)  | 77.5 (57.5-100.0)  | 0.002*  |
| General Health       | 62.5 (40.0-81.3)   | 75.0 (55.0-90.0)    | 55.0 (35.0-70.0)   | 0.003*  |
| Vitality             | 62.5 (45.0-85.0)   | 75.0 (65.0-90.0)    | 55.0 (35.0-75.0)   | <0.001* |
| Social Functioning   | 87.5 (62.5-100.0)  | 100.0 (87.5-100.0)  | 87.5 (62.5-100.0)  | 0.004*  |
| Role Emotional       | 100.0 (66.7-100.0) | 100.0 (100.0-100.0) | 100.0 (33.3-100.0) | 0.021   |
| Mental health        | 84.0 (67.0-92.0)   | 84.0 (76.0-92.0)    | 80.0 (60.0-92.0)   | 0.030   |
| PCS                  | 53.0 (42.1-57.9)   | 54.6 (45.5-58.5)    | 49.5 (36.4-56.9)   | 0.026   |
| MCS                  | 52.3 (44.2-56.9)   | 55.4 (49.2-58.1)    | 49.4 (42.6-55.7)   | 0.004*  |
| <b>HADS</b>          |                    |                     |                    |         |
| Anxiety score        | 4.0 (2.0-7.0)      | 4.0 (1.0-5.0)       | 5.0 (2.0-9.0)      | 0.028   |
| Depression score     | 2.0 (0.8-3.0)      | 1.0 (0.0-3.0)       | 2.0 (1.0-5.0)      | 0.004*  |
| Total score          | 5.5 (3.0-10.3)     | 5.0 (2.0-7.0)       | 6.0 (4.0-16.0)     | 0.014*  |

Data are expressed as medians (IQR).

RDSQ= Rotterdam Disease Specific Questionnaire; SF-36= Short Form 36; HADS= Hospital Anxiety and Depression Scale; PCS= Physical Component Summary; MCS= Mental Component Summary.

\* Significant after Bonferroni correction.

**TABLE 2b.** Male-female scores of TAD-patients on all questionnaires.

|                      | <b>Total (n=147)</b> | <b>Males (n=93)</b> | <b>Females (n=54)</b> | <b>p-value</b> |
|----------------------|----------------------|---------------------|-----------------------|----------------|
| <b>RDSQ</b>          |                      |                     |                       |                |
| Total score          | 59.0 (34.0-89.0)     | 54.0 (31.0-81.5)    | 67.5 (39.0-98.5)      | 0.057          |
| <b>SF-36</b>         |                      |                     |                       |                |
| Physical Functioning | 80.0 (55.0-95.0)     | 85.0 (65.0-95.0)    | 72.5 (43.8-90.0)      | 0.001*         |
| Role Physical        | 75.0 (25.0-100.0)    | 100.0 (37.5-100.0)  | 37.5 (0.0-100.0)      | 0.001*         |
| Bodily Pain          | 80.0 (57.5-100.0)    | 90.0 (67.5-100.0)   | 67.5 (45.0-92.5)      | 0.003*         |
| General Health       | 50.0 (35.0-70.0)     | 50.0 (37.5-75.0)    | 50.0 (33.8-65.0)      | 0.233          |
| Vitality             | 60.0 (40.0-75.0)     | 65.0 (47.5-80.0)    | 47.5 (33.8-61.3)      | 0.002*         |
| Social Functioning   | 87.5 (62.5-100.0)    | 100.0 (62.5-100.0)  | 75.0 (50.0-100.0)     | 0.004*         |
| Role Emotional       | 100.0 (58.3-100.0)   | 100.0 (100.0-100.0) | 66.7 (25.0-100.0)     | <0.001*        |
| Mental health        | 80.0 (60.0-88.0)     | 80.0 (64.0-88.0)    | 72.0 (56.0-88.0)      | 0.019          |
| PCS                  | 47.3 (37.3-53.0)     | 49.3 (40.1-53.7)    | 41.7 (35.0-50.6)      | 0.010          |
| MCS                  | 57.8 (39.4-56.9)     | 54.0 (46.4-57.2)    | 45.7 (36.3-53.7)      | 0.003*         |
| <b>HADS</b>          |                      |                     |                       |                |
| Anxiety score        | 4.0 (2.0-7.0)        | 4.0 (2.0-6.0)       | 4.0 (2.0-8.0)         | 0.204          |
| Depression score     | 2.0 (1.0-5.0)        | 2.0 (0.0-5.0)       | 2.0 (1.0-5.0)         | 0.509          |
| Total score          | 6.0 (3.0-12.0)       | 6.0 (3.0-11.0)      | 6.5 (4.0-13.8)        | 0.320          |

Data are expressed as medians (IQR).

TAD= Thoracic aortic aneurysm  $\geq$  40 mm; RDSQ= Rotterdam Disease Specific Questionnaire; SF-36= Short Form 36; HADS= Hospital Anxiety and Depression Scale; PCS= Physical Component Summary; MCS= Mental Component Summary.

\* Significant after Bonferroni correction.
