# Supplementary material for: Health-related quality of life and lived experiences in males and females with thoracic aortic disease and their partners
Source: PubMed Central journal article supplement — Open Heart. 2020 Oct 8;7(2):e001419. doi: 10.1136/openhrt-2020-001419 (PMC7545641; doi:10.1136/openhrt-2020-001419), 2020-10-08
Supplement: openhrt-2020-001419supp004.pdf [file openhrt-2020-001419supp004.pdf]

**SUPPLEMENTAL FILE 4.** Male-female scores on the Rotterdam Disease Specific Questionnaire.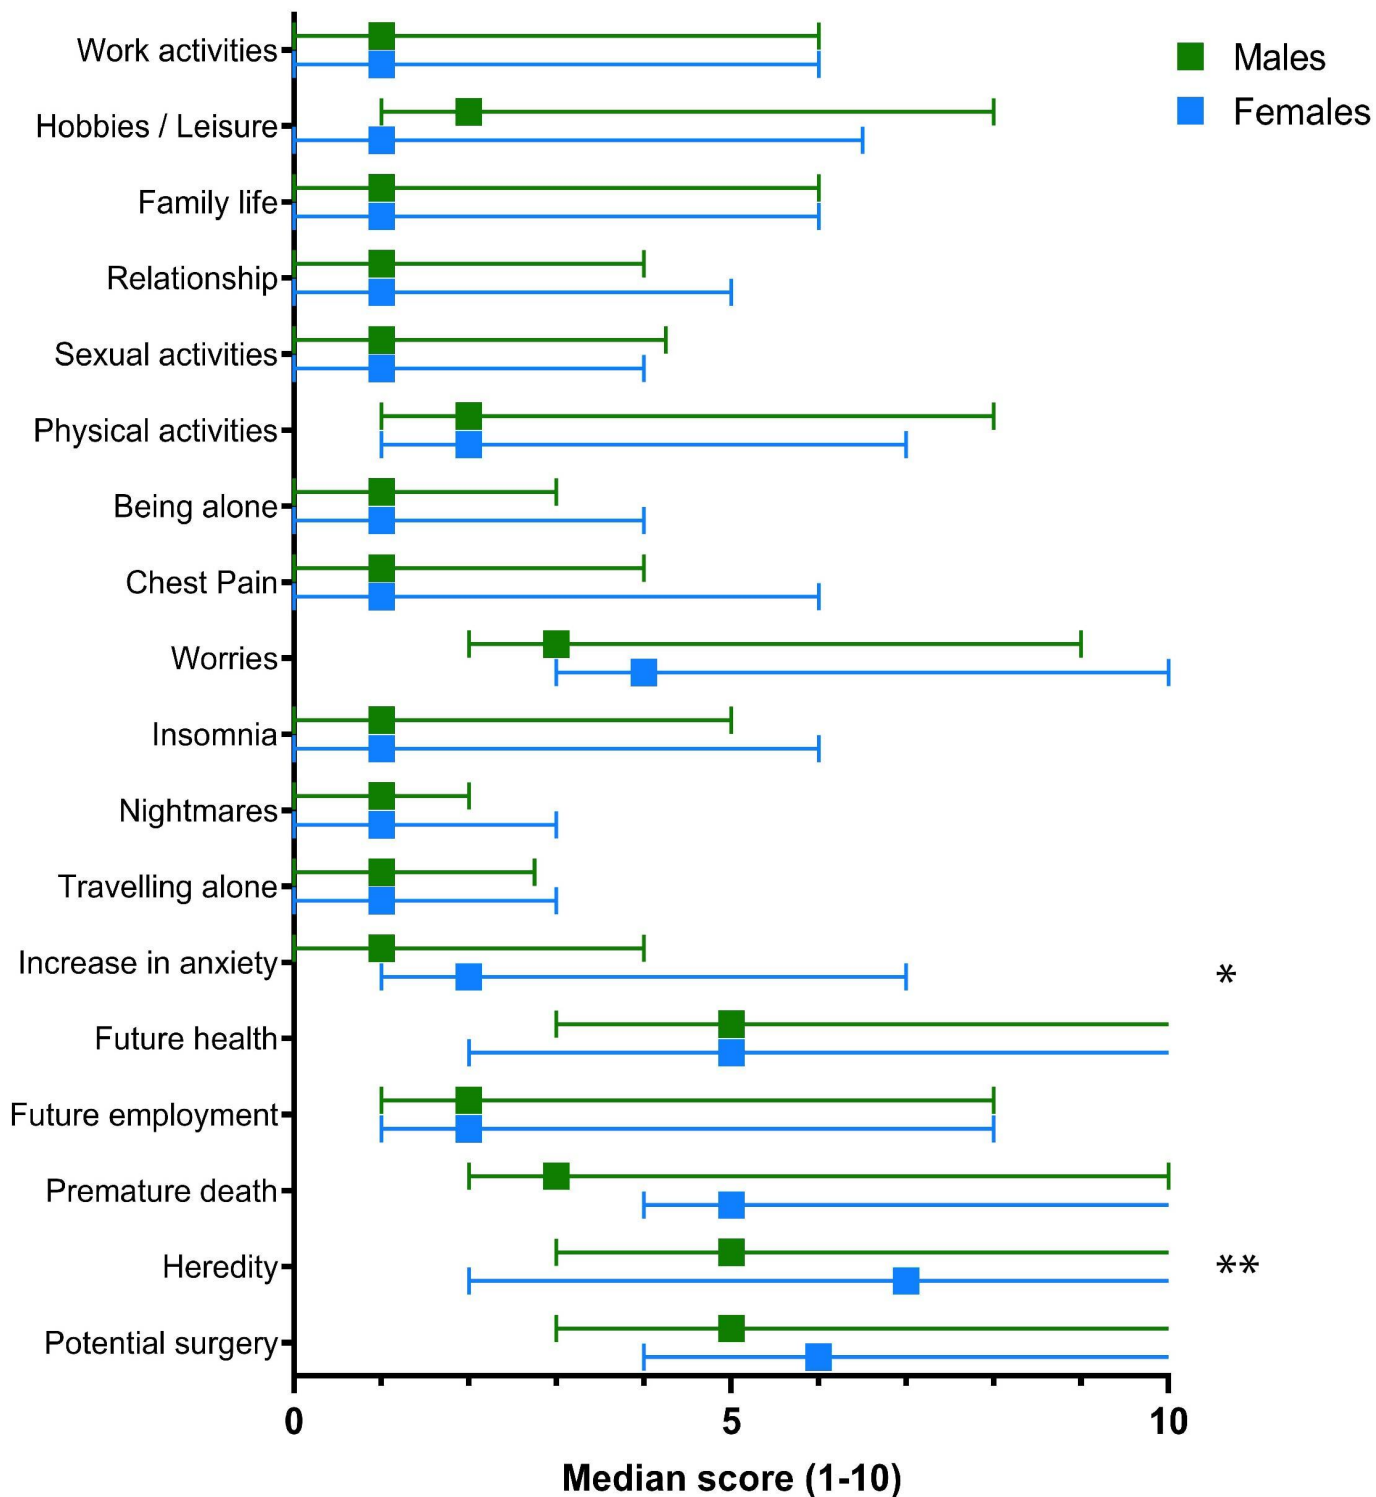

\* Significant at the 0.05 level

\*\* Significant at the 0.01 level
