# Supplementary material for: Health-related quality of life and lived experiences in males and females with thoracic aortic disease and their partners
Source: PubMed Central journal article supplement — Open Heart. 2020 Oct 8;7(2):e001419. doi: 10.1136/openhrt-2020-001419 (PMC7545641; doi:10.1136/openhrt-2020-001419), 2020-10-08
Supplement: openhrt-2020-001419supp005.pdf [file openhrt-2020-001419supp005.pdf]

**SUPPLEMENTAL FILE 5. Univariable and multivariable analyses****Univariable analysis screening-participants and TAD-patients**

| Variable                                                | RDSQ score  |         | HADS anxiety score |         | HADS depression score |          |
|---------------------------------------------------------|-------------|---------|--------------------|---------|-----------------------|----------|
|                                                         | Coefficient | p-value | Coefficient        | p-value | Coefficient           | p-value  |
| Age - y                                                 | -0.04       | 0.770   | -0.04              | 0.024*  | -0.01                 | 0.535    |
| Sex                                                     | 5.31        | 0.209   | 1.47               | 0.003** | 0.74                  | 0.114    |
| Length - m                                              | -0.10       | 0.482   | -0.02              | 0.263   | -0.01                 | 0.725    |
| Weight - kg                                             | -0.11       | 0.335   | -0.02              | 0.186   | 0.00                  | 0.985    |
| BSA                                                     | -9.84       | 0.313   | -1.64              | 0.151   | -0.01                 | 0.996    |
| Hypertension                                            | 2.70        | 0.525   | -0.12              | 0.817   | 0.21                  | 0.661    |
| Hyperlipidemia                                          | 0.39        | 0.937   | -0.32              | 0.578   | 0.05                  | 0.923    |
| Smoking                                                 | 2.72        | 0.717   | 1.23               | 0.169   | 1.57                  | 0.056    |
| Diabetes                                                | 13.56       | 0.241   | 2.12               | 0.120   | 3.97                  | 0.002**  |
| Renal dysfunction                                       | 8.02        | 0.603   | 0.66               | 0.717   | -1.30                 | 0.449    |
| Depression                                              | -1.34       | 0.879   | 2.05               | 0.048*  | 2.44                  | 0.013*   |
| Anxiety                                                 | 15.61       | 0.364   | 6.14               | 0.002** | 7.59                  | <0.001** |
| Beta blocker use                                        | 6.91        | 0.169   | -0.46              | 0.437   | 0.94                  | 0.092    |
| ARB use                                                 | 9.52        | 0.129   | 0.32               | 0.662   | 0.36                  | 0.608    |
| ACEi use                                                | 1.04        | 0.857   | -0.62              | 0.355   | 0.04                  | 0.950    |
| Diagnosis                                               |             |         |                    |         |                       |          |
| Marfan Syndrome                                         | 8.75        | 0.432   | -1.10              | 0.402   | -1.34                 | 0.284    |
| Loeys-Dietz Syndrome                                    | -6.98       | 0.531   | -2.14              | 0.102   | -2.07                 | 0.097    |
| Ehlers-Danlos Syndrome                                  | -39.62      | 0.105   | -2.58              | 0.373   | -2.40                 | 0.381    |
| Other                                                   | -12.40      | 0.224   | -0.50              | 0.680   | -0.05                 | 0.964    |
| Positive family history aortic disease                  | -4.86       | 0.252   | -0.27              | 0.593   | -0.48                 | 0.308    |
| Abdominal aortic aneurysm                               | -11.18      | 0.334   | -0.53              | 0.699   | 1.10                  | 0.396    |
| Maximal diameter aortic root                            | 0.62        | 0.106   | -0.06              | 0.164   | -0.01                 | 0.873    |
| Indexed diameter aortic root <sup>1</sup> (mm/BSA)      | 2.13        | 0.010** | 0.04               | 0.684   | 0.01                  | 0.890    |
| Maximal diameter ascending aorta                        | 0.90        | 0.004** | -0.01              | 0.815   | 0.014                 | 0.694    |
| Indexed diameter ascending aorta <sup>1</sup> (mm/BSA)  | 1.85        | 0.002** | 0.07               | 0.344   | 0.04                  | 0.551    |
| Maximal diameter descending aorta                       | 0.26        | 0.483   | -0.03              | 0.568   | 0.03                  | 0.437    |
| Indexed diameter descending aorta <sup>1</sup> (mm/BSA) | 1.04        | 0.187   | 0.04               | 0.657   | 0.136                 | 0.131    |
| Previous aortic surgery                                 | 7.90        | 0.214   | -0.12              | 0.872   | 1.70                  | 0.016*   |
| Previous dissection                                     | 11.63       | 0.118   | -0.14              | 0.873   | 0.41                  | 0.62     |
| Current partner                                         | 13.04       | 0.034*  | 1.98               | 0.009** | 1.52                  | 0.035*   |
| Current employment                                      | 7.35        | 0.125   | 0.16               | 0.774   | 0.01                  | 0.988    |
| Exercise                                                | -5.614      | 0.200   | -0.10              | 0.851   | -0.34                 | 0.498    |

BSA=Body Surface Area; ARB= Angiotensin II receptor blocker; ACEi= Angiotensin Converting Enzyme inhibitor; LVEF= left ventricular ejection fraction; MFS= Marfan Syndrome.

\* Significant at the 0.05 level

\*\* Significant at the 0.01 level

<sup>1</sup> Aortic diameter indexed for Body Surface Area.

## Univariable analysis partners

| Variable                                                | RDSQ score  |         | HADS anxiety score |         | HADS depression score |         |
|---------------------------------------------------------|-------------|---------|--------------------|---------|-----------------------|---------|
|                                                         | Coefficient | p-value | Coefficient        | p-value | Coefficient           | p-value |
| Age - y                                                 | 0.16        | 0.581   | 0.05               | 0.252   | 0.07                  | 0.097   |
| Sex                                                     | 0.78        | 0.915   | -0.82              | 0.339   | -0.36                 | 0.658   |
| Length - m                                              | -0.30       | 0.375   | -0.00              | 0.910   | -0.03                 | 0.518   |
| Weight - kg                                             | -0.26       | 0.263   | 0.01               | 0.750   | -0.00                 | 0.970   |
| BSA                                                     | -18.62      | 0.268   | 0.395              | 0.845   | -0.52                 | 0.792   |
| Hypertension                                            | 9.12        | 0.220   | 0.00               | 0.998   | 1.01                  | 0.226   |
| Hyperlipidemia                                          | 16.82       | 0.023*  | 1.60               | 0.067   | 1.83                  | 0.026*  |
| Smoking                                                 | 42.81       | 0.004** | 1.41               | 0.500   | 4.24                  | 0.042*  |
| Diabetes                                                | 36.79       | 0.031*  | 1.76               | 0.370   | 3.90                  | 0.034*  |
| Renal dysfunction                                       | -           | -       | -                  | -       | -                     | -       |
| Depression                                              | 12.44       | 0.287   | -0.54              | 0.705   | -0.69                 | 0.611   |
| Anxiety                                                 | -           | -       | -                  | -       | -                     | -       |
| Beta blocker use                                        | 13.59       | 0.076   | 0.82               | 0.362   | 1.37                  | 0.103   |
| ARB use                                                 | 10.75       | 0.284   | -1.81              | 0.128   | 0.60                  | 0.599   |
| ACEi use                                                | -1.58       | 0.848   | 1.62               | 0.085   | 0.93                  | 0.301   |
| Diagnosis                                               |             |         |                    |         |                       |         |
| Marfan Syndrome                                         | -28.88      | 0.097   | -0.68              | 0.735   | -2.42                 | 0.201   |
| Loeys-Dietz Syndrome                                    | -15.05      | 0.325   | 0.65               | 0.711   | -1.21                 | 0.466   |
| Ehlers-Danlos Syndrome                                  | -3.92       | 0.896   | -                  | -       | -                     | -       |
| Other                                                   | -19.16      | 0.522   | 2.40               | 0.482   | 2.41                  | 0.455   |
| Positive family history aortic disease                  | 7.16        | 0.321   | 0.28               | 0.739   | -0.11                 | 0.891   |
| Abdominal aortic aneurysm                               | 25.43       | 0.040*  | -0.17              | 0.904   | 0.42                  | 0.759   |
| Maximal diameter aortic root                            | 0.85        | 0.191   | 0.07               | 0.382   | 0.02                  | 0.810   |
| Indexed diameter aortic root <sup>1</sup> (mm/BSA)      | 2.92        | 0.016*  | 0.14               | 0.336   | 0.08                  | 0.571   |
| Maximal diameter ascending aorta                        | 1.18        | 0.061   | 0.14               | 0.095   | 0.11                  | 0.140   |
| Indexed diameter ascending aorta <sup>1</sup> (mm/BSA)  | 2.46        | 0.021*  | 0.24               | 0.074   | 0.20                  | 0.119   |
| Maximal diameter descending aorta                       | 0.88        | 0.251   | -0.00              | 0.975   | 0.05                  | 0.590   |
| Indexed diameter descending aorta <sup>1</sup> (mm/BSA) | 2.96        | 0.045*  | -0.08              | 0.643   | 0.14                  | 0.409   |
| Previous aortic surgery                                 | 18.73       | 0.036*  | 1.32               | 0.203   | 1.75                  | 0.073   |
| Previous dissection                                     | 21.77       | 0.080   | 2.97               | 0.035*  | 1.16                  | 0.394   |
| Current employment                                      | -4.27       | 0.594   | -0.33              | 0.670   | -0.60                 | 0.448   |
| Exercise                                                | -11.74      | 0.134   | -0.34              | 0.719   | -0.37                 | 0.679   |

BSA=Body Surface Area; ARB= Angiotensin II receptor blocker; ACEi= Angiotensin Converting Enzyme inhibitor; LVEF= left ventricular ejection fraction; MFS= Marfan Syndrome.

\* Significant at the 0.05 level

\*\* Significant at the 0.01 level

<sup>1</sup> Aortic diameter indexed for Body Surface Area.

| <b>Multivariable analyses in screening participants and TAD-patients</b> |                    |               |                |
|--------------------------------------------------------------------------|--------------------|---------------|----------------|
| <b>HADS anxiety score</b>                                                |                    |               |                |
| <b>Covariate</b>                                                         | <b>Coefficient</b> | <b>95% CI</b> | <b>p-value</b> |
| Intercept                                                                | 4.26               |               | 0.044          |
| Sex                                                                      | 1.81               |               | 0.058          |
| Age                                                                      | -0.03              |               | 0.279          |
| History of depression                                                    | -2.17              |               | 0.275          |
| History of anxiety disorder                                              | 6.89               |               | 0.006          |
| <b>HADS depression score</b>                                             |                    |               |                |
| <b>Covariate</b>                                                         | <b>Coefficient</b> | <b>95% CI</b> | <b>p-value</b> |
| Intercept                                                                | -1.19              |               | 0.651          |
| Sex                                                                      | 0.89               |               | 0.364          |
| Age                                                                      | -0.04              |               | 0.180          |
| History of depression                                                    | -1.90              |               | 0.42           |
| History of anxiety disorder                                              | 9.80               |               | <0.001         |
| Previous aortic surgery                                                  | 3.55               |               | 0.016          |
| Diabetes Mellitus                                                        | 6.38               |               | 0.009          |
| Indexed descending aortic diameter <sup>1</sup>                          | 0.36               |               | 0.028          |
| <b>RDSQ score</b>                                                        |                    |               |                |
| <b>Covariate</b>                                                         | <b>Coefficient</b> | <b>95% CI</b> | <b>p-value</b> |
| Intercept                                                                | 30.68              |               | 0.093          |
| Sex                                                                      | 11.36              |               | 0.142          |
| Age                                                                      | 0.06               |               | 0.786          |
| History of depression                                                    | -4.42              |               | 0.783          |
| History of anxiety disorder                                              | 6.10               |               | 0.756          |
| Employment                                                               | 17.28              |               | 0.023          |
| <b>Multivariable analyses in partners</b>                                |                    |               |                |
| <b>HADS anxiety score</b>                                                |                    |               |                |
| <b>Covariate</b>                                                         | <b>Coefficient</b> | <b>95% CI</b> | <b>p-value</b> |
| Intercept                                                                | 1.31               |               | 0.666          |
| Age                                                                      | 0.06               |               | 0.200          |
| Sex                                                                      | -0.40              |               | 0.667          |
| Previous aortic dissection                                               | 7.42               |               | <0.001         |
| ARB use                                                                  | -5.79              |               | 0.007          |
| <b>HADS depression score</b>                                             |                    |               |                |
| <b>Covariate</b>                                                         | <b>Coefficient</b> | <b>95% CI</b> | <b>p-value</b> |
| Intercept                                                                | -4.15              |               | 0.198          |
| Age                                                                      | 0.06               |               | 0.241          |
| Sex                                                                      | 1.60               |               | 0.085          |
| Previous aortic surgery                                                  | 3.30               |               | 0.010          |
| <b>RDSQ score</b>                                                        |                    |               |                |
| <b>Covariate</b>                                                         | <b>Coefficient</b> | <b>95% CI</b> | <b>p-value</b> |
| Intercept                                                                | -14.95             |               | 0.692          |
| Age                                                                      | 0.75               |               | 0.183          |
| Sex                                                                      | 12.64              |               | 0.247          |
| Previous aortic dissection                                               | 36.41              |               | 0.049          |

HADS= Hospital Anxiety and Depression Scale; RDSQ= Rotterdam Disease Specific Questionnaire; TAD= Thoracic aortic disease; ARB= Angiotensin Receptor Blocker; CI= Confidence Interval.

<sup>1</sup> Aortic diameter indexed for Body Surface Area.
